# Supplementary material for: Prior cancer and risk of monoclonal gammopathy of undetermined significance: a population-based study in Iceland and Sweden
Source: PubMed Central journal article supplement — Haematologica. 2024 Jan 11;109(7):2250–5. doi: 10.3324/haematol.2023.284365 (PMC11215371; doi:10.3324/haematol.2023.284365), 2024-01-11
Supplement: 2023_284365_ROGNVALDSSON_SUPPL.pdf [file 2023_284365_ROGNVALDSSON_SUPPL.pdf]

# Prior cancer and risk of monoclonal gammopathy of undetermined significance: a population-based study in Iceland and Sweden

Sæmundur Rögnvaldsson,<sup>1,2</sup> Sigrun Thorsteinsdóttir,<sup>1,3</sup> Elisavet Syriopoulou,<sup>4,5</sup> Ingigerdur Sverrisdottir,<sup>1,6</sup> Ingemar Turesson,<sup>7</sup> Elias Eythorsson,<sup>1,2</sup> Jon Thorir Oskarsson,<sup>1</sup> Thorir Einarsson Long,<sup>1,7</sup> Brynjar Vidarsson,<sup>2</sup> Pall Torfi Onundarson,<sup>1,2</sup> Bjarni A. Agnarsson,<sup>1,2</sup> Margret Sigurdardottir,<sup>2</sup> Isleifur Olafsson,<sup>2</sup> Ingunn Thorsteinsdottir,<sup>2</sup> Thor Aspelund,<sup>1</sup> Gauti Kjartan Gislason,<sup>1</sup> Andri Olafsson,<sup>1</sup> Jon Kristinn Sigurdsson,<sup>1</sup> Malin Hultcrantz,<sup>8</sup> Brian G. M. Durie,<sup>9</sup> Stephen Harding,<sup>10</sup> Magnus Bjorkholm,<sup>4,11</sup> Ola Landgren,<sup>12</sup> Thorvardur Jon Love<sup>1,2</sup> and Sigurdur Yngvi Kristinsson<sup>1,2</sup>

<sup>1</sup>Faculty of Medicine, University of Iceland, Reykjavík, Iceland; <sup>2</sup>Landspítali – The National University Hospital of Iceland, Reykjavík, Iceland; <sup>3</sup>Rigshospitalet, Copenhagen, Denmark; <sup>4</sup>Karolinska Institutet, Stockholm, Sweden; <sup>5</sup>Red Door Analytics AB, Stockholm, Sweden; <sup>6</sup>Sahlgrenska University Hospital, Gothenburg, Sweden; <sup>7</sup>Skåne University Hospital, Lund, Sweden; <sup>8</sup>Myeloma Service, Department of Medicine, Memorial Sloan-Kettering Cancer Center, New York, NY, USA; <sup>9</sup>Samuel Oschin Comprehensive Cancer Institute, Cedars-Sinai Outpatient Cancer Center, Los Angeles, CA, USA; <sup>10</sup>Binding Site Group Ltd., Birmingham, UK; <sup>11</sup>Karolinska University Hospital, Stockholm, Sweden and <sup>12</sup>Myeloma Program, Department of Medicine, University of Miami, Sylvester Comprehensive Cancer Center, Miami, FL, USA

**Correspondence:** S. Rögnvaldsson  
[srognvald@hi.is](mailto:srognvald@hi.is)

**Received:** September 25, 2023.

**Accepted:** January 4, 2024.

**Early view:** January 11, 2024.

<https://doi.org/10.3324/haematol.2023.284365>

©2024 Ferrata Storti Foundation

Published under a CC BY-NC license

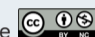

## Abstract

There is some evidence that a prior cancer is a risk factor for the development of multiple myeloma (MM). If this is true, prior cancer should be associated with a higher prevalence or increased progression rate of monoclonal gammopathy of undetermined significance (MGUS), the precursor of MM and related disorders. Those with a history of cancer might therefore constitute a target population for MGUS screening. This two-part study is the first study to evaluate a relationship between MGUS and prior cancers. First, we evaluated whether prior cancers were associated with having MGUS at the time of screening in the Iceland Screens Treats or Prevents Multiple Myeloma (iStopMM) study that includes 75,422 individuals screened for MGUS. Next, we evaluated the association of prior cancer and the progression of MGUS to MM and related disorders in a population-based cohort of 13,790 Swedish individuals with MGUS. A history of prior cancer was associated with a modest increase in the risk of MGUS (odds ratio=1.10; 95% confidence interval: 1.00-1.20). This excess risk was limited to prior cancers in the year preceding MGUS screening. A history of prior cancer was associated with progression of MGUS, except for myeloid malignancies which were associated with a lower risk of progression (hazard ratio=0.37; 95% confidence interval: 0.16-0.89;  $P=0.028$ ). Our findings indicate that a prior cancer is not a significant etiological factor in plasma cell disorders. The findings do not warrant MGUS screening or different management of MGUS in those with a prior cancer.

**Supplementary table 1:** The international classification of diseases (ICD) 10 and 9 diagnostic codes used to define prior cancer and its subtypes.

| <b>Category</b>                         | <b>ICD 10</b>                                         | <b>ICD 9</b>                                                                                     | <b>ICD 7</b>                                  |
|-----------------------------------------|-------------------------------------------------------|--------------------------------------------------------------------------------------------------|-----------------------------------------------|
| <b><u>Myeloproliferative</u></b>        | D45, D473, D475, D471, D475, D46, C929, C93, C94, C92 | 45, 2091, 473, 2089, 475, 2090, 471, 475, 2081, 46, 2059, 929, 2052, 2060, 93, 207, 94, 92, 2051 | 2079, 209, 2071, 2059, 2050, 2073, 2072, 2051 |
| <b><u>Non-melanoma skin cancer</u></b>  | C44                                                   | 44, 173                                                                                          | 191                                           |
| <b><u>Solid cancer</u></b>              |                                                       |                                                                                                  |                                               |
| <i>Bone and soft tissue</i>             | C40, C41, C49                                         | 40, 41, 49, 170, 171                                                                             | 196, 197                                      |
| <i>Breast</i>                           | C50                                                   | 50, 174, 175                                                                                     | 170                                           |
| <i>Central nervous system</i>           | C71, C70, C72, D33, D32                               | 71, 191, 70, 1923, 72, 33, 32                                                                    | 1930, 1930, 1939                              |
| <i>Female reproductive</i>              | C51, C52, C57, C58, C53, C54, C55, C56                | 51, 52, 57, 58, 181, 184, 53, 180, 54, 55, 179, 182, 56                                          | 176, 1751, 1759, 1994, 171, 172, 174, 1750    |
| <i>Gastrointestinal</i>                 | C15, C16, C17, C18, C19, C20, C21                     | 15, 150, 16, 151, 17, 152, 18, 19, 20, 153, 1541, 1540, 21, 1542, 1590                           | 150, 151, 152, 153, 1540, 1541, 1539          |
| <i>Head and neck</i>                    | C0, C10, C11, C12, C13, C14, C30, C31, C32, C69       | 10, 11, 12, 13, 14, 14, 30, 31, 160, 32, 161, 69, 190                                            | 14, 160, 161, 192                             |
| <i>Hepatic, biliary, and pancreatic</i> | C22, C23, C24, C25                                    | 22, 155, 23, 24, 156, 25, 157                                                                    | 1550, 1551, 1552, 1553, 1520, 1955            |
| <i>Lung</i>                             | C34, C33, C384, C45                                   | 34, 33, 1620, 163, 1622, 1623, 1624, 1625, 1629, 1628, 384, 45                                   | 1621, 1620, 163, 1622                         |
| <i>Male reproductive</i>                | C60, C61, C62, C63                                    | 60, 187, 61, 185, 62, 63, 186                                                                    | 177, 178, 1797, 1791                          |
| <i>Melanoma</i>                         | C43                                                   | 43, 172                                                                                          | 190                                           |
| <i>Other</i>                            | C47, C37                                              | 47, 37                                                                                           |                                               |
| <i>Thyroid and endocrine</i>            | C73, C74, C75, D35                                    | 73, 193, 74, 1940, 75, 35, 1941, 1942, 1943, 1944, 1945, 1946, 1948, 1949                        | 194, 1950                                     |
| <i>Urinary tract</i>                    | C67, C66, C65, C64, C68                               | 67, 66, 65, 188, 1891, 1892, 1897, 1898, 1899, 64, 1890, 1896, 68                                | 1801, 181, 1800, 1809                         |

**Supplementary table 2:** Odds ratios for MGUS and MGUS subtypes for the different solid cancer subtypes included in the study. 1: Adjusted for sex and age; 2: Modelling not performed due to low number of events (<10) in the MGUS group.

|                                    | w/t MGUS      | with MGUS   | OR (95% CI) <sup>1</sup>  |
|------------------------------------|---------------|-------------|---------------------------|
| n                                  | 73,316        | 3,846       |                           |
| Gastrointestinal                   | 850 ( 1.2%)   | 71 ( 1.8%)  | 1.00 (0.78 - 1.29)        |
| Head and Neck                      | 174 ( 0.2%)   | 17 ( 0.4%)  | 1.32 (0.80 - 2.20)        |
| Hepatic, biliary, and pancreatic   | 72 ( 0.1%)    | 12 ( 0.3%)  | <b>2.59 (1.39 - 4.84)</b> |
| Lung                               | 284 ( 0.4%)   | 25 ( 0.7%)  | 1.21 (0.80 - 1.83)        |
| Breast                             | 1,869 ( 2.5%) | 117 ( 3.0%) | 1.09 (0.90 - 1.33)        |
| Female reproductive organs         | 681 ( 0.9%)   | 36 ( 0.9%)  | 0.93 (0.66 - 1.31)        |
| Male reproductive organs           | 1,504 ( 2.1%) | 150 ( 3.9%) | 1.00 (0.84 - 1.19)        |
| Urinary tract                      | 750 ( 1.0%)   | 79 ( 2.1%)  | <b>1.27 (1.00 - 1.61)</b> |
| Thyroid and endocrine              | 323 ( 0.4%)   | 19 ( 0.5%)  | 1.07 (0.67 - 1.71)        |
| Central nervous system             | 274 ( 0.4%)   | 12 ( 0.3%)  | 0.77 (0.43 - 1.37)        |
| Bone and soft tissues <sup>2</sup> | 76 ( 0.1%)    | 3 ( 0.1%)   |                           |
| Melanoma                           | 428 ( 0.6%)   | 27 ( 0.7%)  | 1.09 (0.73 - 1.62)        |

**Supplementary table 3:** Subdistribution hazard ratios (sHRs) for MGUS progression overall and to specific disorders for those with MGUS and a prior history of cancer compared to those without a prior history of cancer. Statistically significant results are shown in bold.

|                                              | n with prior cancer | n with progression  |                        | sHR (95% CI)            |
|----------------------------------------------|---------------------|---------------------|------------------------|-------------------------|
|                                              |                     | <i>prior cancer</i> | <i>no prior cancer</i> |                         |
| <b><u>Any progression</u></b>                |                     |                     |                        |                         |
| Any prior cancer                             | 1,834               | 170                 | 1,488                  | 1.13 (0.97-1.32)        |
| Solid cancer                                 | 1,508               | 144                 | 1,514                  | 0.99 (0.84-1.17)        |
| Non-melanoma skin cancer                     | 240                 | 26                  | 1,634                  | 1.20 (0.82-1.77)        |
| Myeloid cancer                               | 115                 | 5                   | 1,653                  | <b>0.41 (0.17-0.97)</b> |
| <b><u>Multiple myeloma</u></b>               |                     |                     |                        |                         |
| Any prior cancer                             | 1,834               | 92                  | 867                    | 0.95 (0.77-1.18)        |
| Solid cancer                                 | 1,508               | 75                  | 884                    | 0.91 (0.72-1.15)        |
| Non-melanoma skin cancer                     | 240                 | 17                  | 943                    | 1.43 (0.87-2.35)        |
| Myeloid cancer                               | 115                 | 3                   | 956                    | 0.44 (0.14-1.36)        |
| <b><u>Waldenströms macroglobulinemia</u></b> |                     |                     |                        |                         |
| Any prior cancer                             | 1,834               | 34                  | 295                    | 0.96 (0.67-1.37)        |
| Solid cancer                                 | 1,508               | 30                  | 299                    | 1.00 (0.68-1.47)        |
| Non-melanoma skin cancer                     | 240                 | 5                   | 324                    | 1.04 (0.43-2.51)        |
| Myeloid cancer                               | 115                 | 0                   | 329                    | -                       |
| <b><u>Amyloidosis</u></b>                    |                     |                     |                        |                         |
| Any prior cancer                             | 1,834               | 11                  | 112                    | 0.85 (0.46-1.60)        |
| Solid cancer                                 | 1,508               | 10                  | 113                    | 0.88 (0.46-1.69)        |
| Non-melanoma skin cancer                     | 240                 | 1                   | 122                    | 0.62 (0.09-4.51)        |
| Myeloid cancer                               | 115                 | 0                   | 123                    | -                       |
| <b><u>Other LP</u></b>                       |                     |                     |                        |                         |
| Any prior cancer                             | 1,834               | 33                  | 214                    | 1.31 (0.91-1.91)        |
| Solid cancer                                 | 1,508               | 28                  | 219                    | 1.37 (0.92-2.85)        |
| Non-melanoma skin cancer                     | 240                 | 3                   | 244                    | 0.91 (0.29-2.85)        |
| Myeloid cancer                               | 115                 | 2                   | 245                    | 1.16 (0.29-4.67)        |

HR: Hazard ratio; CI: Confidence interval
